# Supplementary material for: A transcriptional blueprint for a spiral-cleaving embryo
Source: PubMed Central journal article supplement (PMC4974748; doi:10.1186/s12864-016-2860-6), 2016-08-05

## BUSCO Analysis

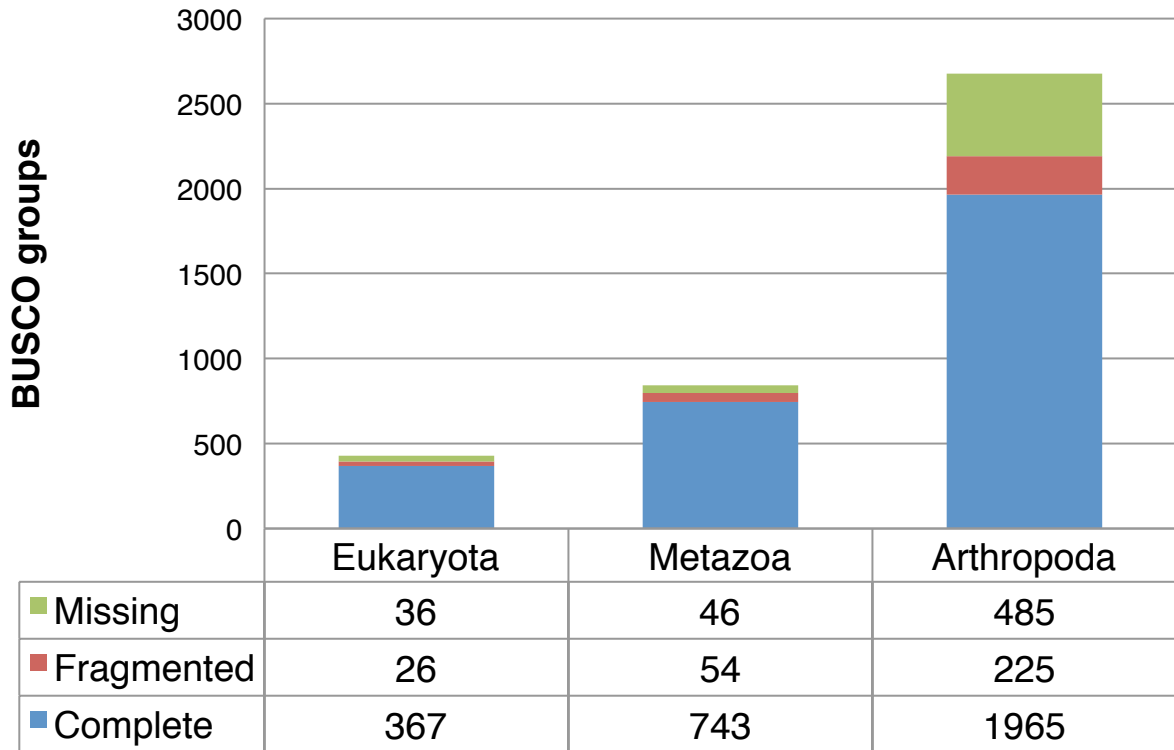

Supplement: 12864_2016_2860_MOESM1_ESM.pdf [file 12864_2016_2860_MOESM1_ESM.pdf]
