# Supplementary material for: A transcriptional blueprint for a spiral-cleaving embryo
Source: PubMed Central journal article supplement (PMC4974748; doi:10.1186/s12864-016-2860-6), 2016-08-05

**A**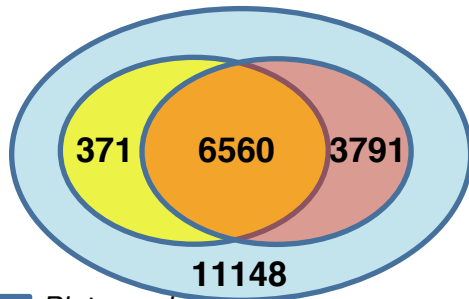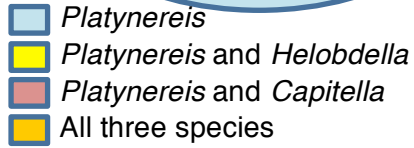**B**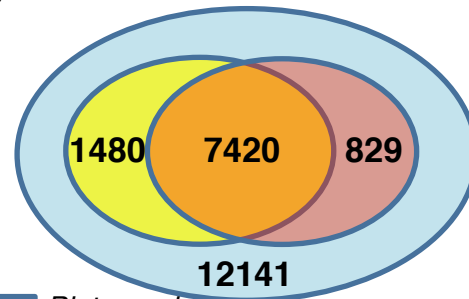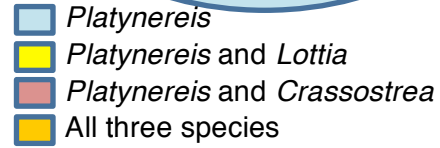**C**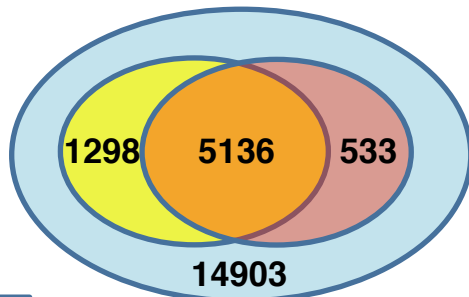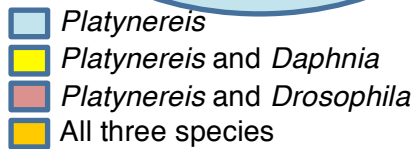**D**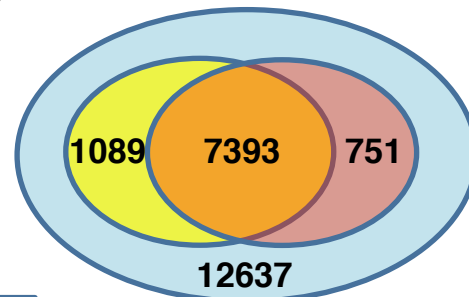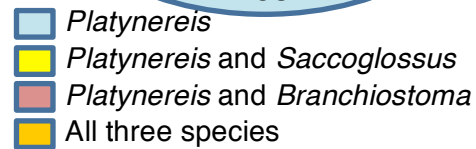**E**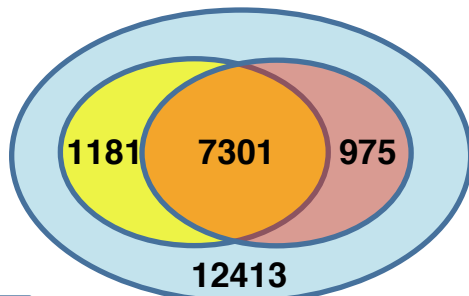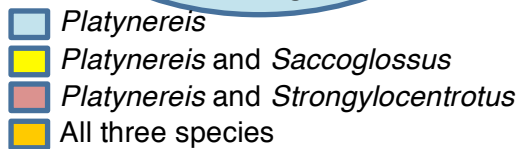**F**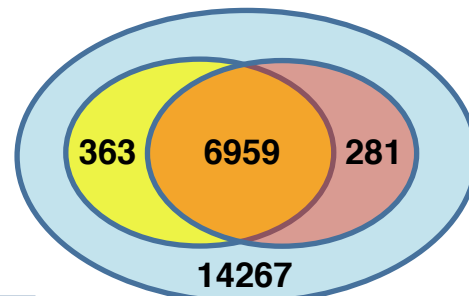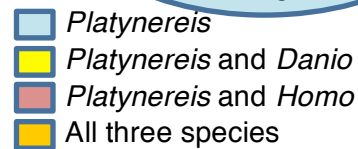**G**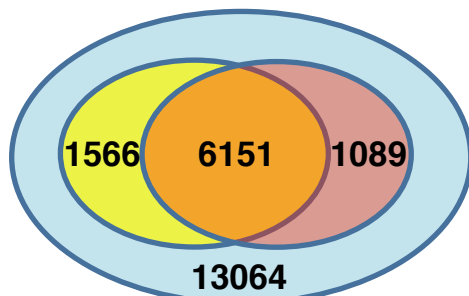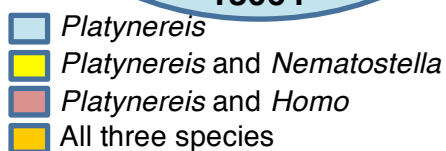

Supplement: 12864_2016_2860_MOESM2_ESM.pdf [file 12864_2016_2860_MOESM2_ESM.pdf]
