# Supplementary material for: A transcriptional blueprint for a spiral-cleaving embryo
Source: PubMed Central journal article supplement (PMC4974748; doi:10.1186/s12864-016-2860-6), 2016-08-05

**A**

Color Key

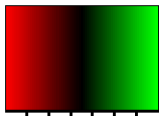5 7 9  
Value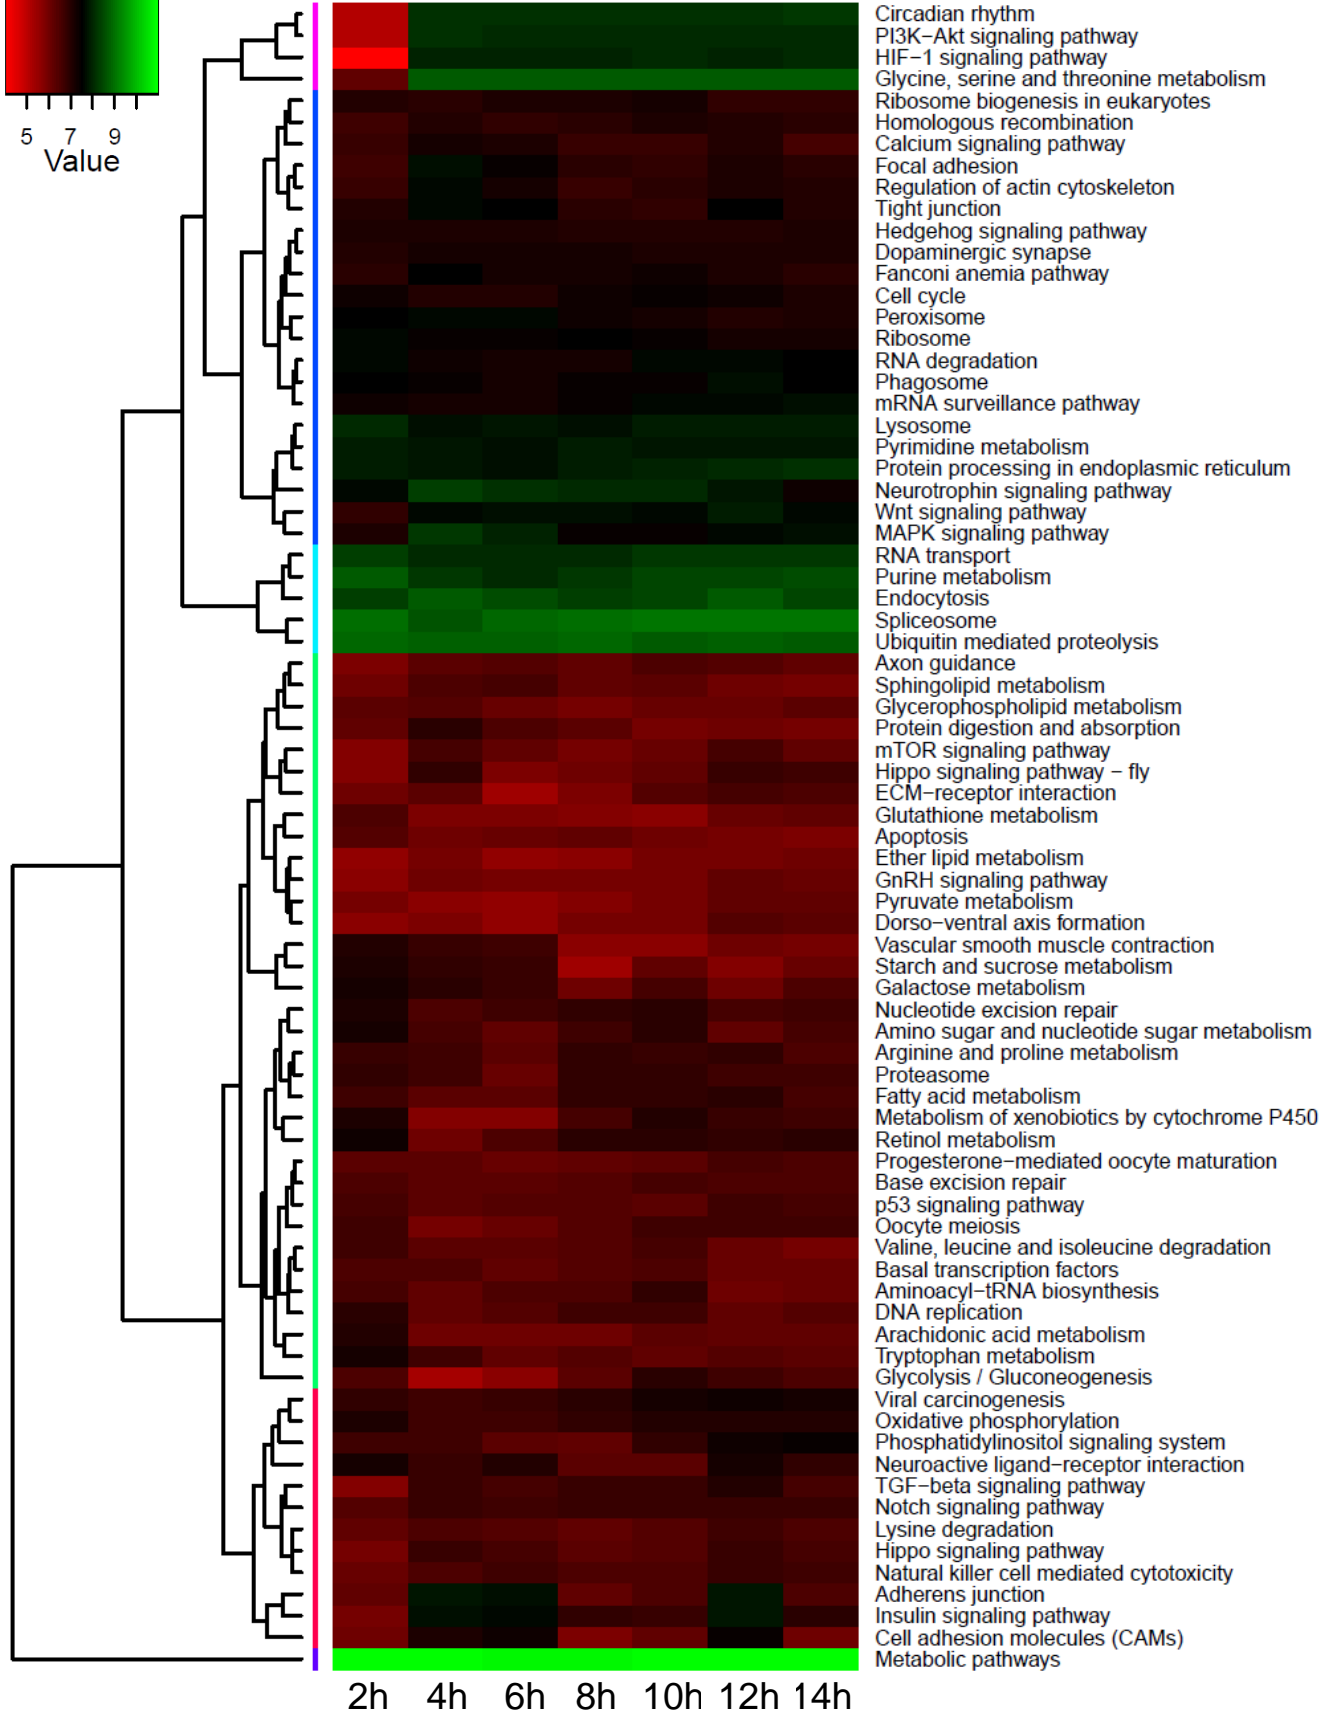

**B**

Color Key

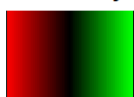3 4 5 6  
Value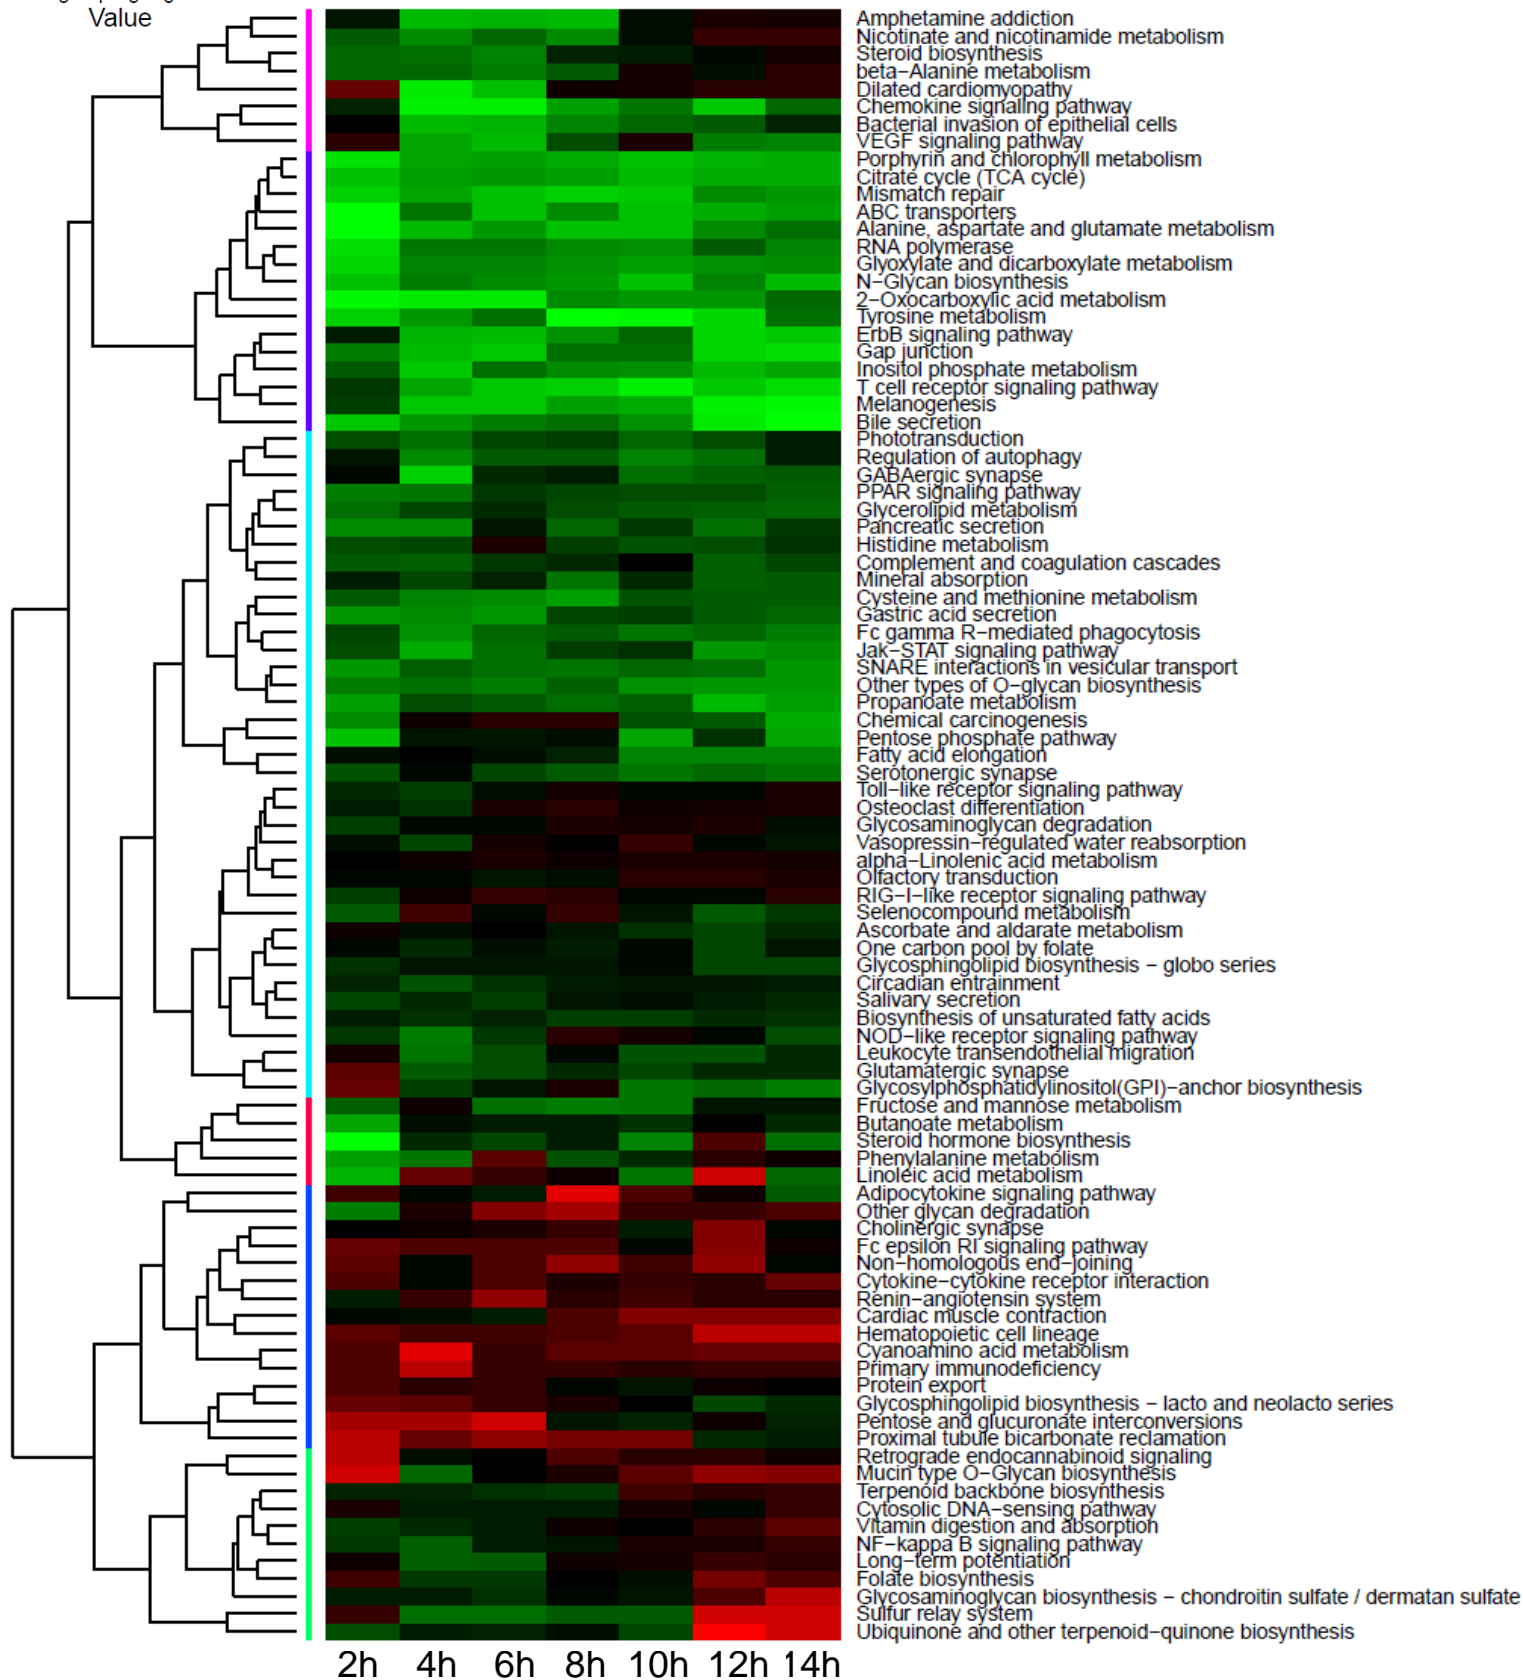

**C**

Color Key

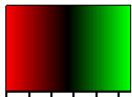0 2 4  
Value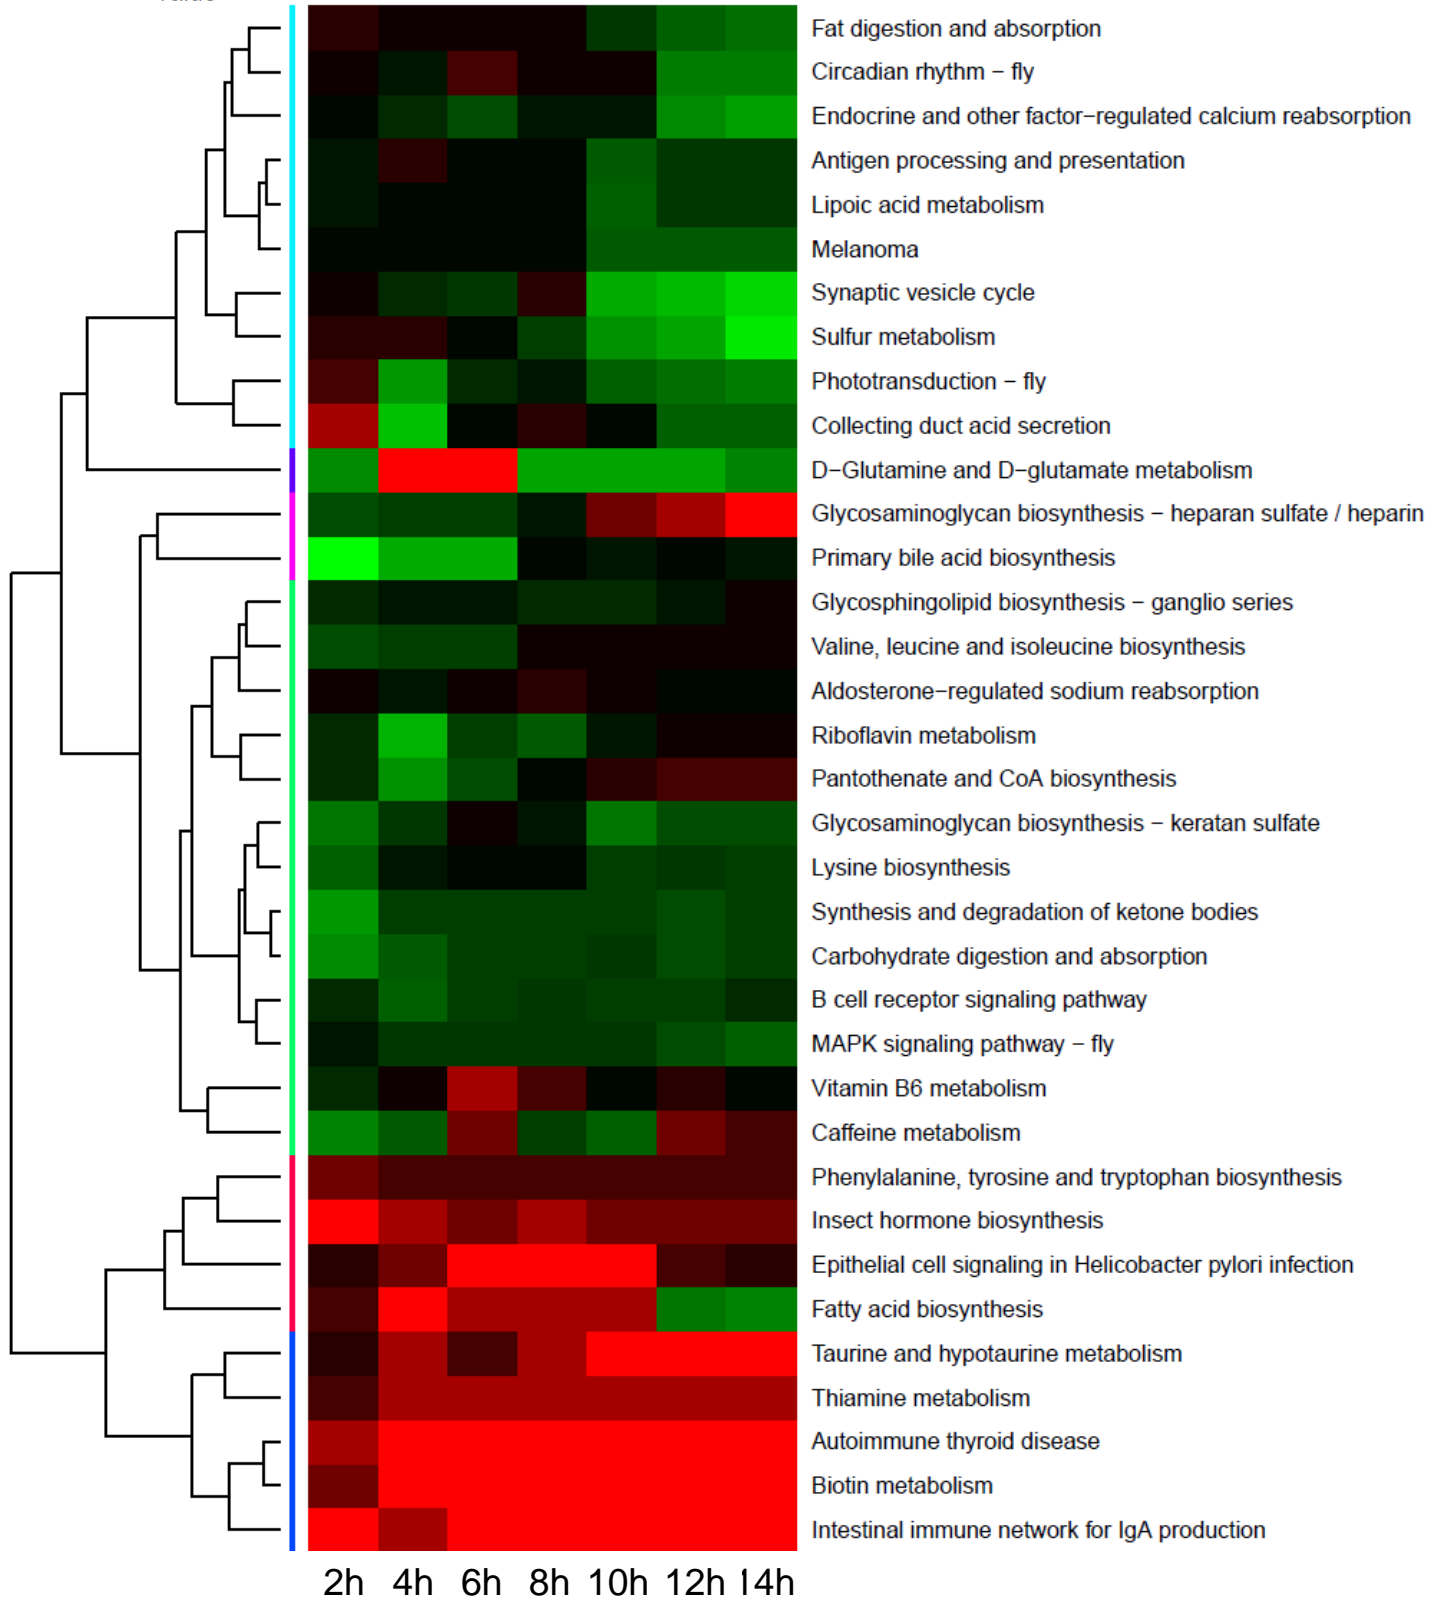

2h 4h 6h 8h 10h 12h 14h

**D**

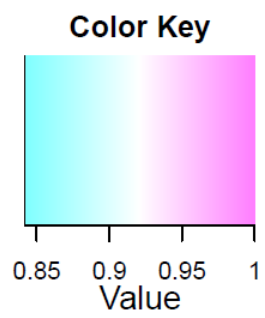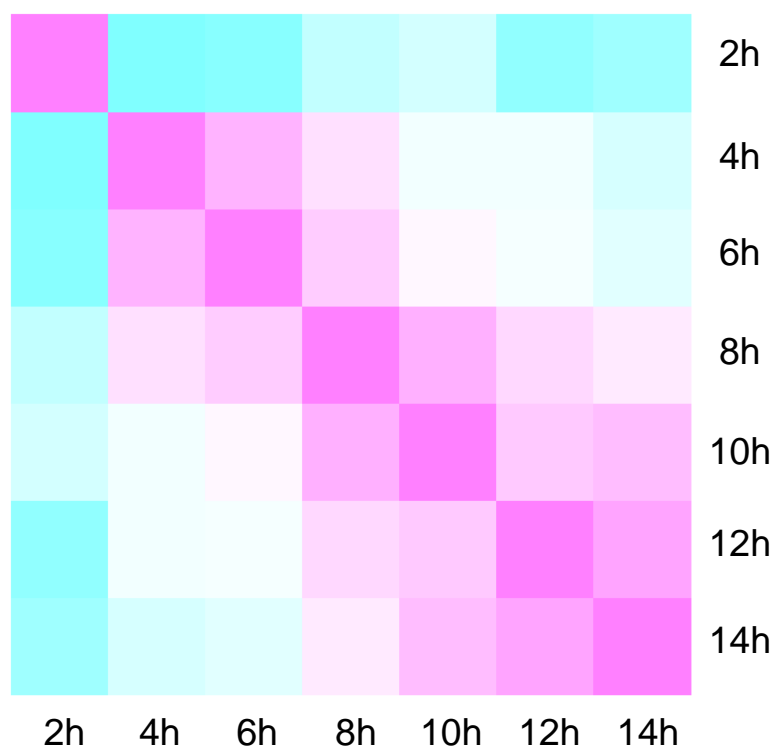

Supplement: 12864_2016_2860_MOESM8_ESM.pdf [file 12864_2016_2860_MOESM8_ESM.pdf]
