# Supplementary material for: A transcriptional blueprint for a spiral-cleaving embryo
Source: PubMed Central journal article supplement (PMC4974748; doi:10.1186/s12864-016-2860-6), 2016-08-05

**A**

**Color Key**

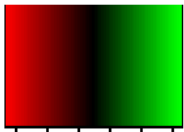

6 8 10  
Value

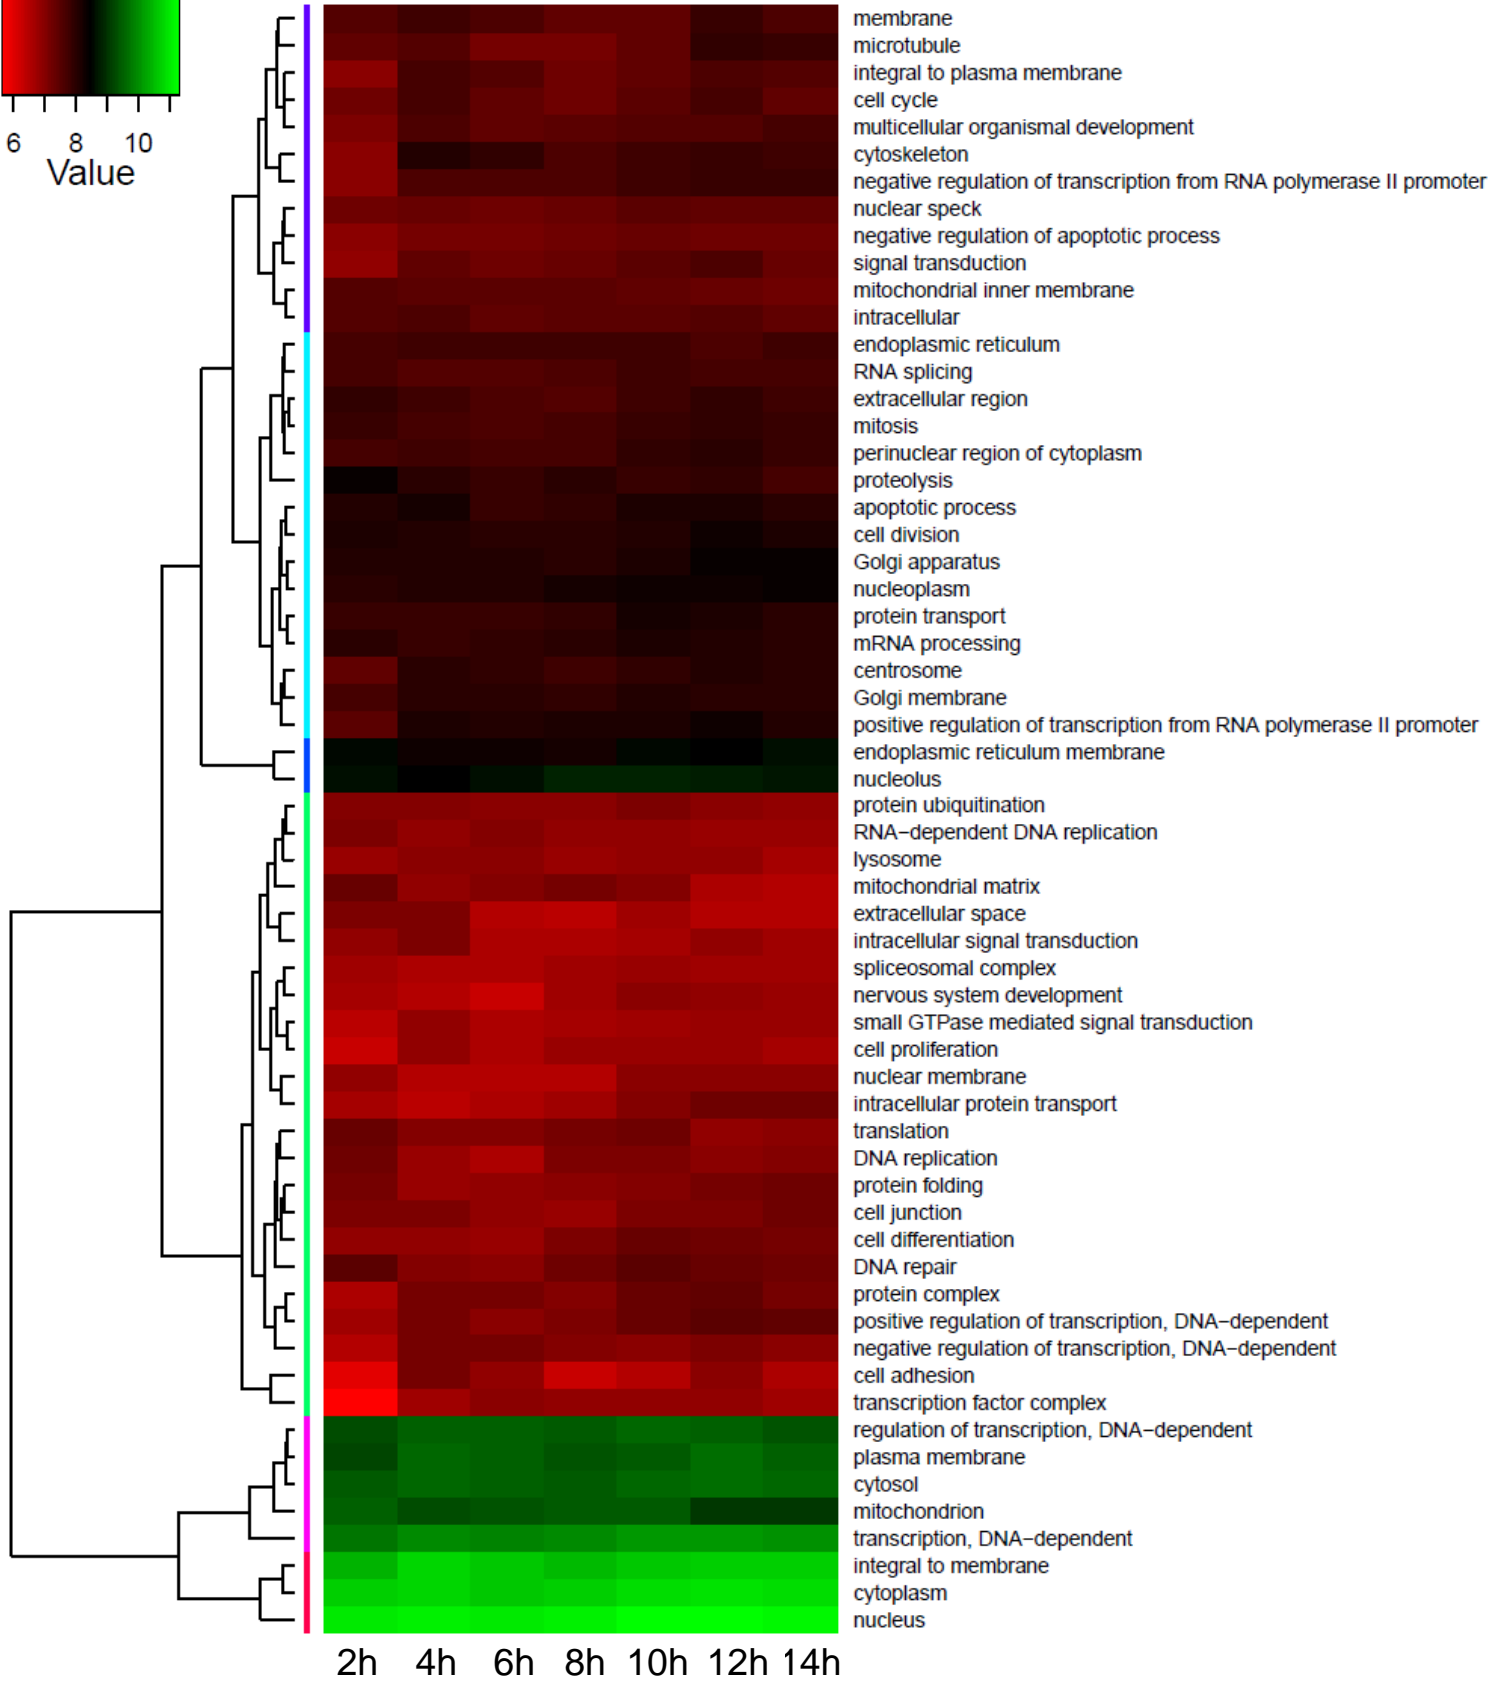

**B**

Color Key

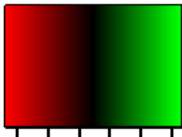

6 8 10  
Value

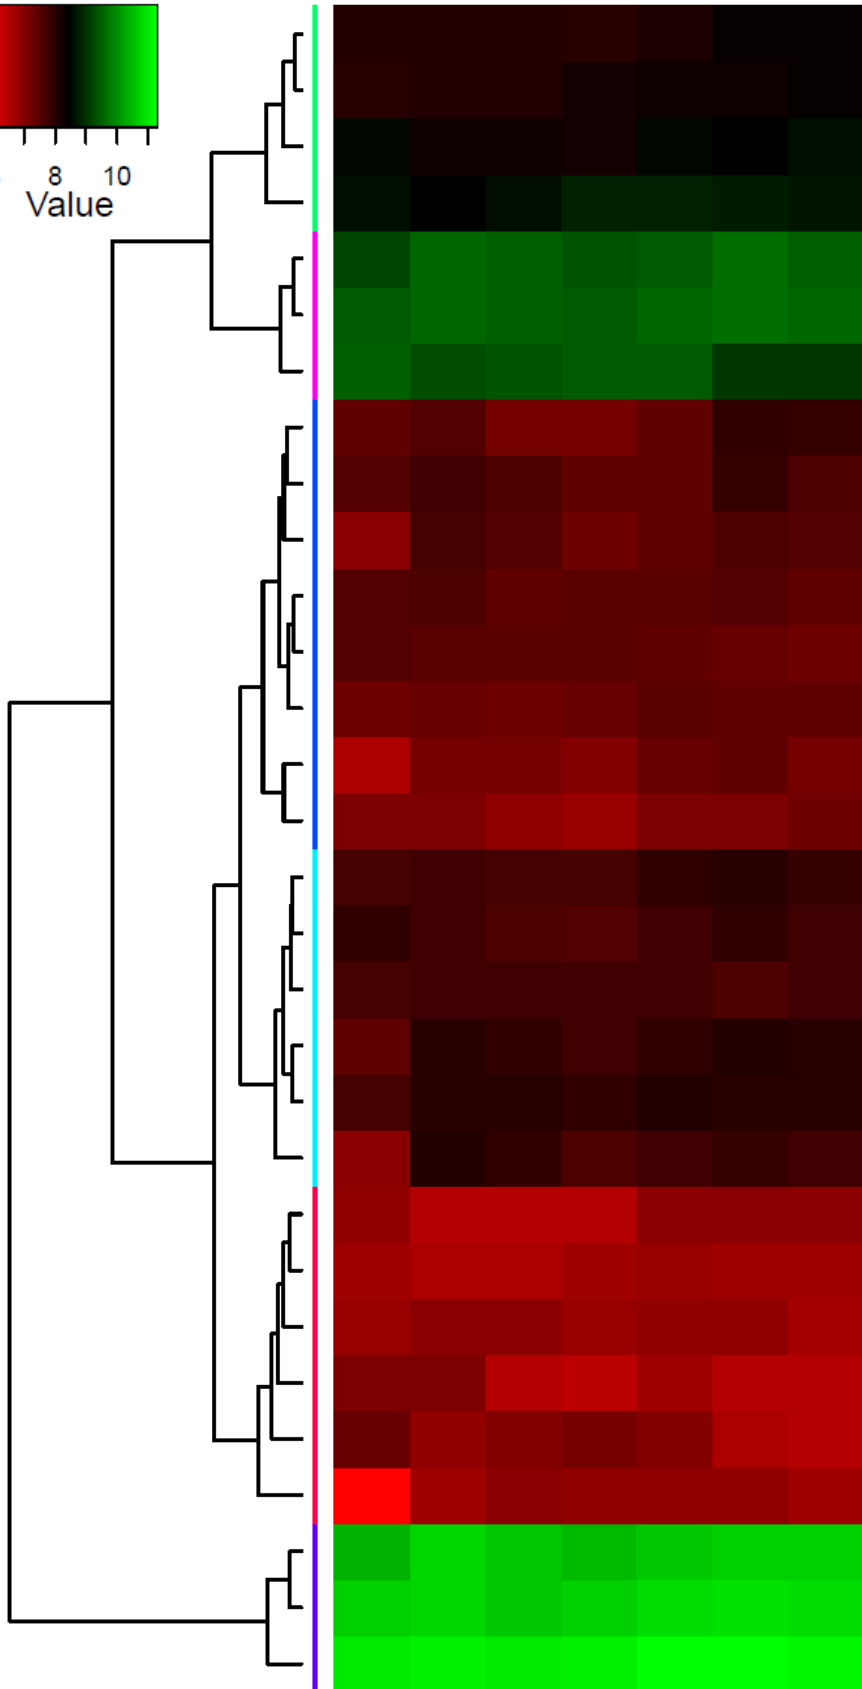

Golgi apparatus  
nucleoplasm  
endoplasmic reticulum membrane  
nucleolus  
plasma membrane  
cytosol  
mitochondrion  
microtubule  
membrane  
integral to plasma membrane  
intracellular  
mitochondrial inner membrane  
nuclear speck  
protein complex  
cell junction  
perinuclear region of cytoplasm  
extracellular region  
endoplasmic reticulum  
centrosome  
Golgi membrane  
cytoskeleton  
nuclear membrane  
spliceosomal complex  
lysosome  
extracellular space  
mitochondrial matrix  
transcription factor complex  
integral to membrane  
cytoplasm  
nucleus

2h 4h 6h 8h 10h 12h 14h

**C****Color Key**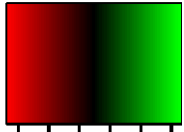6 8 10  
Value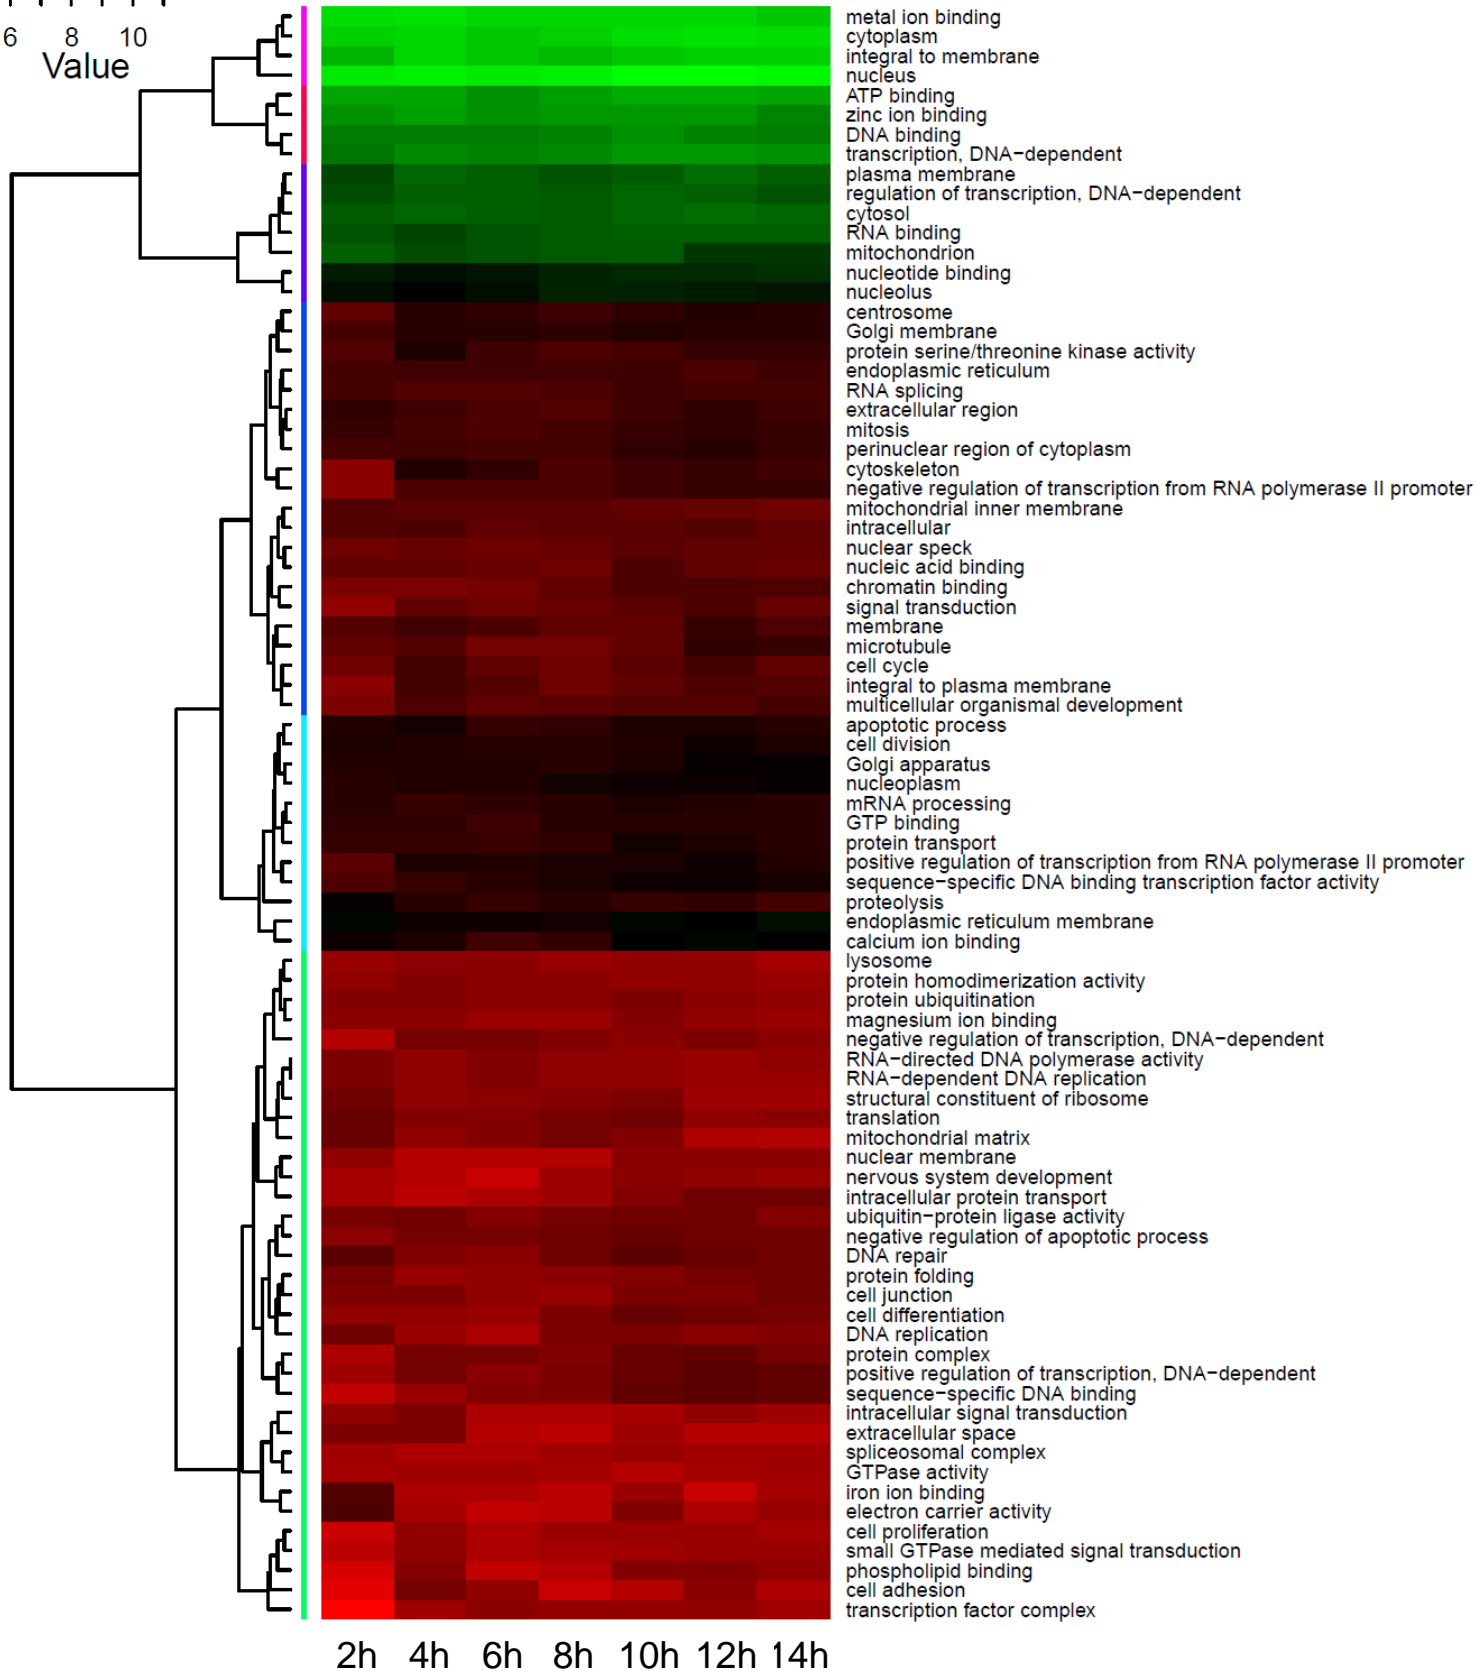

**D**

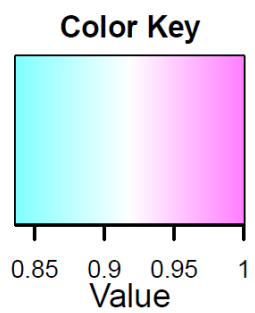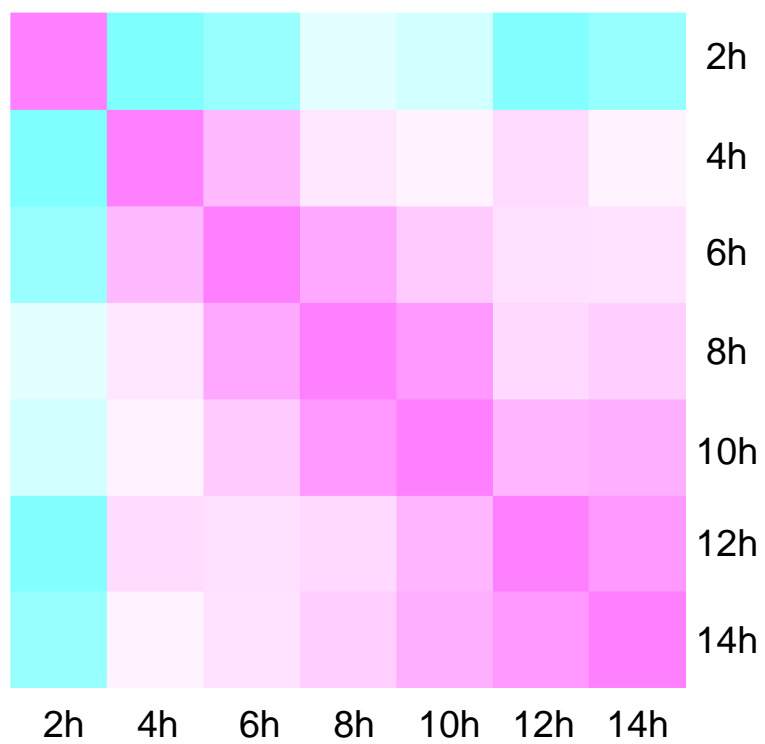

Supplement: 12864_2016_2860_MOESM9_ESM.pdf [file 12864_2016_2860_MOESM9_ESM.pdf]
